# Supplementary material for: Diagnosis of Rare Diseases: a scoping review of clinical decision support systems
Source: Springer Nature journal article supplement (doi:10.1186/s13023-020-01536-z), 2020-09-24
Supplement: MOESM3 [file 18412814]

## Additional file 3- Screening forms

### Part A - Screening form for title and abstract screening

Table 1: Screening form for title and abstract screening

| Question No | Question                                                                                                        | Inclusion                                                                                                      | Exclusion                                                                                                                                         | Decision                                                                                                                                                                               |
|-------------|-----------------------------------------------------------------------------------------------------------------|----------------------------------------------------------------------------------------------------------------|---------------------------------------------------------------------------------------------------------------------------------------------------|----------------------------------------------------------------------------------------------------------------------------------------------------------------------------------------|
| 1           | What type of publication is the article?                                                                        | <ul style="list-style-type: none"> <li>Journal Paper</li> <li>Conference Paper</li> </ul>                      | <ul style="list-style-type: none"> <li>Literature Review</li> <li>Study Protocol</li> <li>Commentary</li> <li>Editorial</li> <li>Other</li> </ul> | <ul style="list-style-type: none"> <li>If inclusion is true, go to question no. 2</li> <li>If exclusion is true, the publication is excluded</li> </ul>                                |
| 2           | Is an abstract available?                                                                                       | Yes, an abstract is available                                                                                  | No, an abstract is not available                                                                                                                  | <ul style="list-style-type: none"> <li>If inclusion is true, go to question no. 3</li> <li>If exclusion is true, the publication is excluded</li> </ul>                                |
| 3           | Is the publication written in English?                                                                          | Yes, the publication is written in English                                                                     | No, the publication is not written in English                                                                                                     | <ul style="list-style-type: none"> <li>If inclusion is true, go to question no. 4</li> <li>If exclusion is true, the publication is excluded</li> </ul>                                |
| 4           | Does the publication contain primary research or report of a Clinical Decision Support System in Rare Diseases? | Yes, the publication contain primary research or report of a Clinical Decision Support System in Rare Diseases | No, the publication contain any other description of software in Rare Diseases and not a Clinical Decision Support System                         | <ul style="list-style-type: none"> <li>If inclusion is true, the publication is selected for full-text screening</li> <li>If exclusion is true, the publication is excluded</li> </ul> |

## Part B - Screening form for full-text screening

Table 2: Screening form for full-text screening

| Question No | Question                                                                                                                     | Inclusion                                                                                                                    | Exclusion                                                                                                                                  | Decision                                                                                                                                                                     |
|-------------|------------------------------------------------------------------------------------------------------------------------------|------------------------------------------------------------------------------------------------------------------------------|--------------------------------------------------------------------------------------------------------------------------------------------|------------------------------------------------------------------------------------------------------------------------------------------------------------------------------|
| 1           | Does the publication mainly describe a specific Clinical Decision Support System for Rare Diseases?                          | Yes, the publication describes a specific Clinical Decision Support System for Rare Diseases                                 | No, the publication describes an implicit Clinical Decision Support System for Rare Diseases                                               | <ul style="list-style-type: none"> <li>• If inclusion is true, go to question no. 2.</li> <li>• If exclusion is true, the publication is excluded</li> </ul>                 |
| 2           | Does the publication describe a clinical prototype or a routine use of a Clinical Decision Support System for Rare Diseases? | Yes, the publication describes a clinical prototype or a routine use of a Clinical Decision Support System for Rare Diseases | No, the publication describes any other types of Clinical Decision Support Systems implementations (e.g. concepts, software-architectures) | <ul style="list-style-type: none"> <li>• If inclusion is true, the publication is used for synthesis</li> <li>• If exclusion is true, the publication is excluded</li> </ul> |
