# Supplementary material for: Diagnosis of Rare Diseases: a scoping review of clinical decision support systems
Source: Springer Nature journal article supplement (doi:10.1186/s13023-020-01536-z), 2020-09-24
Supplement: MOESM4 [file 18412814]

## Additional file 4 – Data charting form

Table 1: Data charting form

| Question no. | Data item                                           | Question                                                                          | Possible Answers                                                                                                                                                                                        | Multiple answers possible |
|--------------|-----------------------------------------------------|-----------------------------------------------------------------------------------|---------------------------------------------------------------------------------------------------------------------------------------------------------------------------------------------------------|---------------------------|
| 1            | Objective and background of the publication/project | What is the objective of the project? Why did the authors developed the CDSS?     | Open answer                                                                                                                                                                                             | Yes                       |
| 2            | System or project name                              | What is the system or project name of the CDSS?                                   | Open answer                                                                                                                                                                                             | Yes                       |
| 3            | Functionality                                       | What is the functionality that performs decision support (e.g. machine learning)? | Open answer                                                                                                                                                                                             | Yes                       |
| 4            | Type of clinical data                               | Which clinical data is used for the basis of decision support?                    | <ul style="list-style-type: none"> <li>• Clinical data</li> <li>• Phenotypic data</li> <li>• Genetic data</li> <li>• Patients questionnaire</li> <li>• Literature databases</li> <li>• Other</li> </ul> | Yes                       |
| 5            | Rare diseases covered                               | Which rare diseases are covered by the CDSS?                                      | Open answer                                                                                                                                                                                             | Yes                       |
| 6            | Development status                                  | What is the development status of the CDSS?                                       | <ul style="list-style-type: none"> <li>• Fully developed system</li> <li>• Clinical prototype</li> </ul>                                                                                                | No                        |
| 7            | System availability                                 | Is the system available for usage?                                                | <ul style="list-style-type: none"> <li>• The system can be downloaded, no registration necessary</li> <li>• The system can be downloaded, subject to registration</li> </ul>                            | No                        |

|    |                            |                                                                                                                                                   |                                                                                                                                                                                                                                                                                       |     |
|----|----------------------------|---------------------------------------------------------------------------------------------------------------------------------------------------|---------------------------------------------------------------------------------------------------------------------------------------------------------------------------------------------------------------------------------------------------------------------------------------|-----|
|    |                            |                                                                                                                                                   | <ul style="list-style-type: none"> <li>• The system can be used online and free, subject to registration</li> <li>• The system can be used online and free, no registration necessary</li> <li>• The system is not available for personal</li> </ul>                                  |     |
| 8  | Data entry and integration | How is data entry organized (e.g. with forms)? Can data be automatically transferred to the CDSS?                                                 | <ul style="list-style-type: none"> <li>• Data entry is only possible with forms</li> <li>• No information available</li> <li>• Data entry with forms and data upload is possible</li> <li>• REST-API available</li> <li>• Data upload is possible</li> <li>• ETL processes</li> </ul> | Yes |
| 9  | Last software update       | In which year was the last software update of the CDSS released?                                                                                  | <ul style="list-style-type: none"> <li>• Information available (Version number, date)</li> <li>• No information available</li> </ul>                                                                                                                                                  | No  |
| 10 | Current clinical usage     | Are there information about the CDSS available regarding clinical usage (e.g. amount of patient cases, amount of users, participating hospitals)? | <ul style="list-style-type: none"> <li>• Information available</li> <li>• No information available</li> </ul>                                                                                                                                                                         | No  |
