# Supplementary material for: Diagnosis of Rare Diseases: a scoping review of clinical decision support systems
Source: Springer Nature journal article supplement (doi:10.1186/s13023-020-01536-z), 2020-09-24
Supplement: MOESM5 [file 18412814]

## Additional file 5- Final relevant publications

Table 1: Final relevant publications

| Title                                                                                                                                                                | System or project-name | Functionality                                         | System availability                                                                                                                                                                                   | Current clinical usage            | Type of clinical data       | Rare Diseases covered       | Development status     | Data entry and integration                                            | Last update              |
|----------------------------------------------------------------------------------------------------------------------------------------------------------------------|------------------------|-------------------------------------------------------|-------------------------------------------------------------------------------------------------------------------------------------------------------------------------------------------------------|-----------------------------------|-----------------------------|-----------------------------|------------------------|-----------------------------------------------------------------------|--------------------------|
| Automated semantic annotation of rare disease cases: a case study                                                                                                    | Taboada et al.         | Information Retrieval                                 | The system can be downloaded, no registration necessary<br><br>Download available via URL:<br><a href="http://www.usc.edu/keam/PhenotypeAnnotation/">http://www.usc.edu/keam/PhenotypeAnnotation/</a> | No information available          | Literature databases        | All rare diseases           | Fully developed system | Data upload is possible                                               | No information available |
| DECIPHER: database for the interpretation of phenotype-linked plausibly pathogenic sequence and copy-number variation                                                | DECIPHER               | Analysis or comparison of genetic and phenotypic data | The system can be used online and free, subject to registration<br><br>Online usage possible via URL:<br><a href="https://decipher.sanger.ac.uk">https://decipher.sanger.ac.uk</a>                    | 270 centres, 36.000 patient cases | Phenotypic and genetic data | All rare diseases           | Fully developed system | Data entry with forms and data upload is possible, REST-API available | No information available |
| Diagnostic support for selected neuromuscular diseases using answer-pattern recognition and data mining techniques: a proof of concept multicenter prospective trial | Grigull et al.         | Machine Learning                                      | The system is not available for personal use                                                                                                                                                          | No information available          | Patients questionnaire      | Neuromuscular rare diseases | Clinical prototype     | No information available                                              | No information available |

| Title                                                                                                                                                                                               | System or project-name | Functionality         | System availability                                                                                                                                                        | Current clinical usage    | Type of clinical data  | Rare Diseases covered                                                                                                                                                                                             | Development status     | Data entry and integration             | Last update              |
|-----------------------------------------------------------------------------------------------------------------------------------------------------------------------------------------------------|------------------------|-----------------------|----------------------------------------------------------------------------------------------------------------------------------------------------------------------------|---------------------------|------------------------|-------------------------------------------------------------------------------------------------------------------------------------------------------------------------------------------------------------------|------------------------|----------------------------------------|--------------------------|
| Diagnostic Support for Selected Pediatric Pulmonary Diseases Using Answer-Pattern Recognition in Questionnaires Based on Combined Data Mining Applications--A Monocentric Observational Pilot Study | Rother et al.          | Machine Learning      | The system is not available for personal use                                                                                                                               | No information available  | Patients questionnaire | Pulmonary rare diseases                                                                                                                                                                                           | Clinical prototype     | No information available               | No information available |
| Finding patients using similarity measures in a rare diseases-oriented clinical data warehouse: Dr. Warehouse and the needle in the needle stack                                                    | Garcelon et al.        | Information Retrieval | The system is not available for personal use                                                                                                                               | 400.000 patients included | Clinical data          | <ul style="list-style-type: none"> <li>• Lowe Syndrome</li> <li>• Dystrophic Epidermolysis Bullosa</li> <li>• Activated PI3K delta Syndrome</li> <li>• Rett Syndrome (RETT) and Dowling Meara (EBS-DM)</li> </ul> | Clinical prototype     | ETL processes                          | No information available |
| FindZebra: a search engine for rare diseases                                                                                                                                                        | FindZebra              | Information Retrieval | The system can be used online and free, no registration necessary<br><br>Online usage possible via URL:<br><a href="http://www.findzebra.com">http://www.findzebra.com</a> | No information available  | Literature databases   | All rare diseases                                                                                                                                                                                                 | Fully developed system | Data entry is only possible with forms | No information available |

| Title                                                                                                                                        | System or project-name | Functionality                                         | System availability                                                                                                                                                                                                                                      | Current clinical usage                                             | Type of clinical data                 | Rare Diseases covered | Development status     | Data entry and integration                            | Last update                                     |
|----------------------------------------------------------------------------------------------------------------------------------------------|------------------------|-------------------------------------------------------|----------------------------------------------------------------------------------------------------------------------------------------------------------------------------------------------------------------------------------------------------------|--------------------------------------------------------------------|---------------------------------------|-----------------------|------------------------|-------------------------------------------------------|-------------------------------------------------|
| GeneMatcher: a matching tool for connecting investigators with an interest in the same gene                                                  | GeneMatcher            | Analysis or comparison of genetic and phenotypic data | The system can be used online and free, subject to registration<br>Online usage possible via URL:<br><a href="https://genematcher.org">https://genematcher.org</a>                                                                                       | 8807 users from 90 countries                                       | Phenotypic and genetic data           | All rare diseases     | Fully developed system | Data entry is possible with forms, REST-API available | No information available                        |
| GeneYenta: a phenotype-based rare disease case matching tool based on online dating algorithms for the acceleration of exome interpretation. | GeneYenta              | Analysis or comparison of genetic and phenotypic data | The system can be used online and free, subject to registration<br>Online usage possible via URL:<br><a href="https://geneyenta.com">https://geneyenta.com</a>                                                                                           | No information available                                           | Phenotypic data                       | All rare diseases     | Fully developed system | Data entry is only possible with forms                | No information available                        |
| GenIO: a phenotype-genotype analysis web server for clinical genomics of rare diseases                                                       | GenIO                  | Analysis or comparison of genetic and phenotypic data | The system can be used online and free, no registration necessary<br>Online usage possible via URL:<br><a href="https://bioinformatics.ibioba-mpsp-conicet.gov.ar/GenIO/index.php">https://bioinformatics.ibioba-mpsp-conicet.gov.ar/GenIO/index.php</a> | No information available                                           | Phenotypic, genetic and clinical data | All rare diseases     | Fully developed system | Data entry with forms and data upload is possible     | Last update: version 1.0, 22nd of November 2017 |
| The Matchmaker Exchange: a platform for rare disease gene discovery                                                                          | Matchmaker Exchange    | Analysis or comparison of genetic and phenotypic data | The system can be used online and free, subject to registration<br>Further information to connect an existing to                                                                                                                                         | Information about connected platforms are available on the website | Phenotypic, genetic and clinical data | All rare diseases     | Fully developed system | REST-API available                                    | Last update: version 1.1, 20th of August 2019   |

| Title                                                                                                                                                                  | System or project-name | Functionality                                         | System availability                                                                                                                                                                    | Current clinical usage        | Type of clinical data                  | Rare Diseases covered      | Development status     | Data entry and integration                                            | Last update                                     |
|------------------------------------------------------------------------------------------------------------------------------------------------------------------------|------------------------|-------------------------------------------------------|----------------------------------------------------------------------------------------------------------------------------------------------------------------------------------------|-------------------------------|----------------------------------------|----------------------------|------------------------|-----------------------------------------------------------------------|-------------------------------------------------|
|                                                                                                                                                                        |                        |                                                       | MatchMaker API:<br><a href="https://www.matchmakerexchange.org/i_have_a_database.html">https://www.matchmakerexchange.org/i_have_a_database.html</a>                                   |                               |                                        |                            |                        |                                                                       |                                                 |
| Real time decision support system for diagnosis of rare cancers, trained in parallel, on a graphics processing unit                                                    | Sidiropoulos et al.    | Machine Learning                                      | The system is not available for personal use                                                                                                                                           | No information available      | Clinical data                          | Rare brain cancer diseases | Clinical prototype     | No information available                                              | No information available                        |
| Utilization of Electronic Medical Records and Biomedical Literature to Support the Diagnosis of Rare Diseases Using Data Fusion and Collaborative Filtering Approaches | Shen et al.            | Information Retrieval                                 | The system is not available for personal use                                                                                                                                           | No information available      | Literature databases and clinical data | All rare diseases          | Clinical prototype     | No information available                                              | No information available                        |
| PhenomeCentral: a portal for phenotypic and genotypic matchmaking of patients with rare genetic diseases                                                               | PhenomeCentral         | Analysis or comparison of genetic and phenotypic data | The system can be used online and free, subject to registration<br><br>Online usage possible via URL:<br><a href="https://www.phenomecentral.org/">https://www.phenomecentral.org/</a> | 10.000 patient cases included | Phenotypic, genetic and clinical data  | All rare diseases          | Fully developed system | Data entry with forms and data upload is possible, REST-API available | Last update: version 1.2.0, 14th of August 2019 |

| Title                                                                                          | System or project-name | Functionality                                         | System availability                                                                                                                                                                              | Current clinical usage    | Type of clinical data                 | Rare Diseases covered | Development status     | Data entry and integration                                            | Last update                                       |
|------------------------------------------------------------------------------------------------|------------------------|-------------------------------------------------------|--------------------------------------------------------------------------------------------------------------------------------------------------------------------------------------------------|---------------------------|---------------------------------------|-----------------------|------------------------|-----------------------------------------------------------------------|---------------------------------------------------|
| Phenopolis: an open platform for harmonization and analysis of genetic and phenotypic data     | Phenopolis             | Analysis or comparison of genetic and phenotypic data | The system can be downloaded, subject to registration<br>Online usage possible via URL:<br><a href="https://phenopolis.org/">https://phenopolis.org/</a>                                         | No information available  | Phenotypic and genetic data           | All rare diseases     | Fully developed system | Data entry is only possible with forms                                | Last update: version 1.0.2, 12th of November 2017 |
| PhenoTips: patient phenotyping software for clinical and research use.                         | PhenoTips              | Analysis or comparison of genetic and phenotypic data | The system can be downloaded, subject to registration<br>Download available via URL:<br><a href="https://phenotips.org/">https://phenotips.org/</a>                                              | Used in over 60 countries | Phenotypic, genetic and clinical data | All rare diseases     | Fully developed system | Data entry with forms and data upload is possible, REST-API available | Last update: version 1.4.7, 17th of May 2019      |
| Clinical Diagnostics in Human Genetics with Semantic Similarity Searches in Ontologies         | Phenomizer             | Analysis or comparison of genetic and phenotypic data | The system can be used online and free, no registration necessary<br>Online usage possible via URL:<br><a href="http://compbio.charite.de/phenomizer/">http://compbio.charite.de/phenomizer/</a> | No information available  | Phenotypic data                       | All rare diseases     | Fully developed system | Data entry is only possible with forms                                | No information available                          |
| PhenoDB: A New Web-Based Tool for the Collection, Storage, and Analysis of Phenotypic Features | PhenoDB                | Analysis or comparison of genetic and phenotypic data | The system can be downloaded, subject to registration<br>Download available via URL:<br><a href="https://phenodb.org/downloads/">https://phenodb.org/downloads/</a>                              | No information available  | Phenotypic and genetic data           | All rare diseases     | Fully developed system | Data entry with forms and data upload is possible                     | No information available                          |

| Title                                                                                                                             | System or project-name | Functionality                                                  | System availability                                                                                                                                                                                     | Current clinical usage      | Type of clinical data                    | Rare Diseases covered | Development status        | Data entry and integration                              | Last update                                          |
|-----------------------------------------------------------------------------------------------------------------------------------|------------------------|----------------------------------------------------------------|---------------------------------------------------------------------------------------------------------------------------------------------------------------------------------------------------------|-----------------------------|------------------------------------------|-----------------------|---------------------------|---------------------------------------------------------|------------------------------------------------------|
| GEMINI:<br>Integrative<br>Exploration of<br>Genetic Variation<br>and Genome<br>Annotations                                        | GEMINI                 | Analysis or<br>comparison of<br>genetic and<br>phenotypic data | The system can be<br>downloaded,<br>subject to<br>registration<br><br>Download<br>available via URL:<br><a href="https://gemini.readthedocs.io/en/latest/">https://gemini.readthedocs.io/en/latest/</a> | No information<br>available | Phenotypic, genetic<br>and clinical data | All rare diseases     | Fully developed<br>system | Data upload and<br>REST-API available                   | Last update: version<br>0.20.1, no date<br>available |
| GenomeConnect:<br>matchmaking<br>between patients,<br>clinical laboratories<br>and researchers to<br>improve genomic<br>knowledge | GenomeConnect          | Analysis or<br>comparison of<br>genetic and<br>phenotypic data | The system can be<br>used online and<br>free, subject to<br>registration<br><br>Online usage<br>possible via URL:<br><a href="https://www.genomeconnect.org/">https://www.genomeconnect.org/</a>        | No information<br>available | Phenotypic and<br>genetic data           | All rare diseases     | Fully developed<br>system | Data entry with forms<br>and data upload is<br>possible | No information<br>available                          |
