# Supplementary material for: Diagnosis of Rare Diseases: a scoping review of clinical decision support systems
Source: Springer Nature journal article supplement (doi:10.1186/s13023-020-01536-z), 2020-09-24
Supplement: MOESM6 [file 18412814]

## Additional file 6 - Overview of REST-APIs

Table 1: Overview of REST-APIs

| <b>CDSS</b>         | <b>URL</b>                                                                                                                                                                                                                        |
|---------------------|-----------------------------------------------------------------------------------------------------------------------------------------------------------------------------------------------------------------------------------|
| DECIPHER            | <a href="https://release.decipherinc.com/s/local/api.html">https://release.decipherinc.com/s/local/api.html</a>                                                                                                                   |
| GeneMatcher         | <a href="https://genematcher.org/help/api">https://genematcher.org/help/api</a>                                                                                                                                                   |
| Matchmaker Exchange | <a href="https://github.com/ga4gh/mme-apis">https://github.com/ga4gh/mme-apis</a>                                                                                                                                                 |
| PhenomeCentral      | <a href="https://phenomecentral.org/download/PhenomeCentral/RemoteMatchAPI/MatchmakerExchangeremotesearchAPIv1.pdf">https://phenomecentral.org/download/PhenomeCentral/RemoteMatchAPI/MatchmakerExchangeremotesearchAPIv1.pdf</a> |
| PhenoTips           | <a href="https://phenotips.org/DevGuide/RESTfulAPI">https://phenotips.org/DevGuide/RESTfulAPI</a>                                                                                                                                 |
